# Supplementary material for: Endothelial cell-derived extracellular vesicles modulate the therapeutic efficacy of mesenchymal stem cells through IDH2/TET pathway in ARDS
Source: Springer Nature journal article supplement (doi:10.1186/s12964-024-01672-0), 2024-05-27

# Figure 1D

mouse ALIX

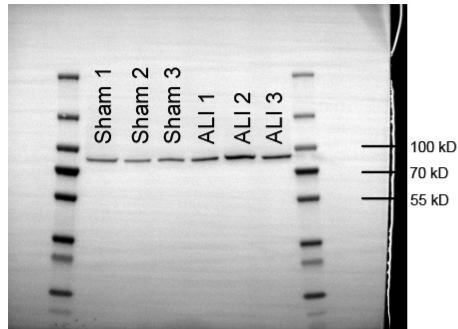

mouse CD63

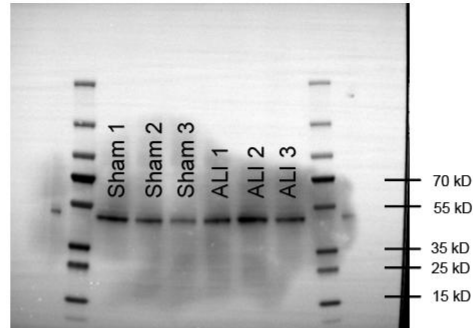

mouse TSG101

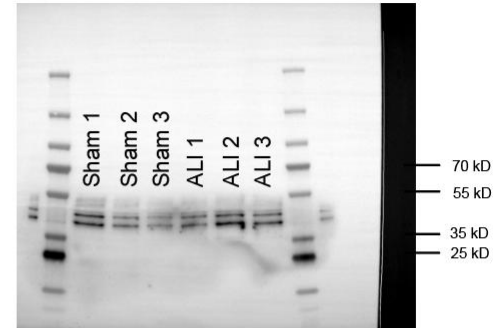

human ALIX

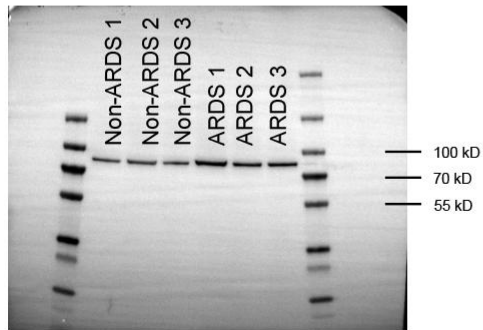

human CD63

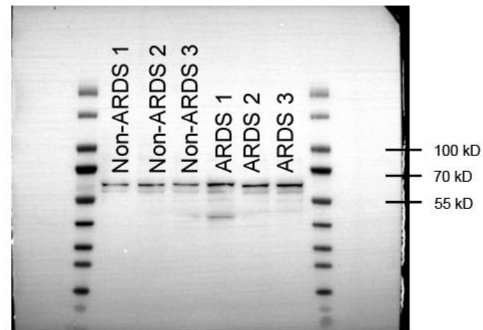

human TSG101

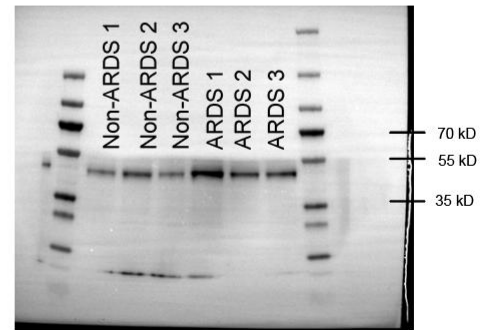

# Figure 2C

ALIX

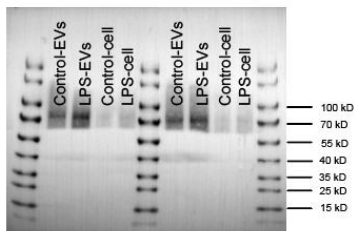

TSG101

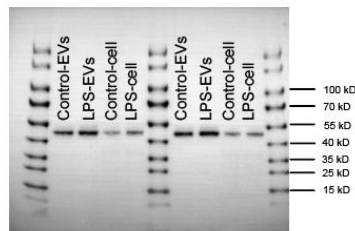

Calnexin

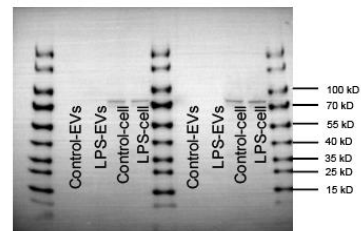

ALIX

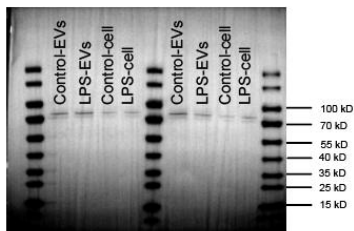

TSG101

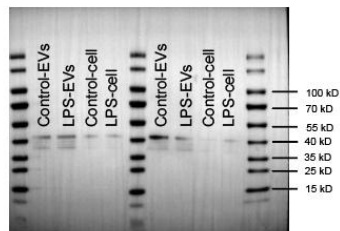

Calnexin

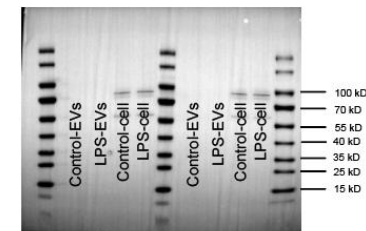

CD63

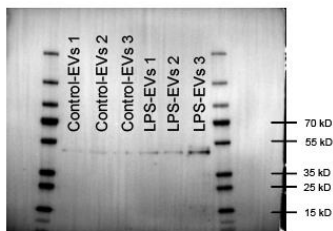

CD63

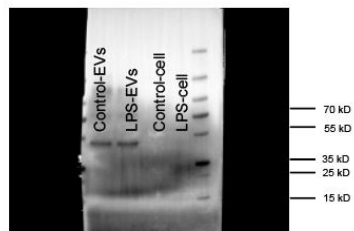

Figure 3K

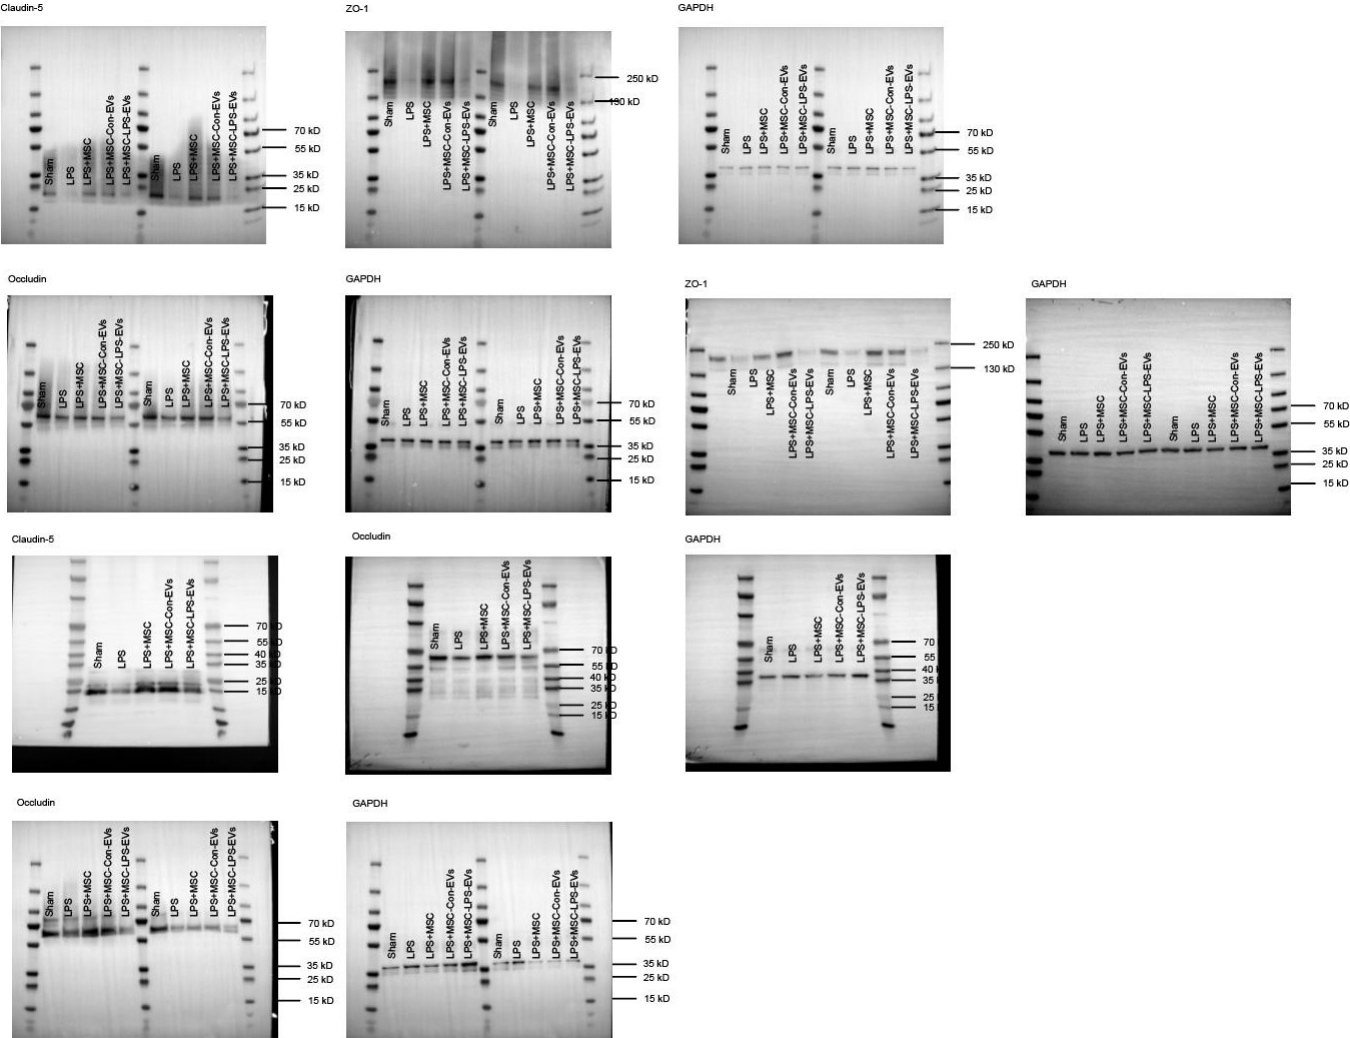

### Figure 30

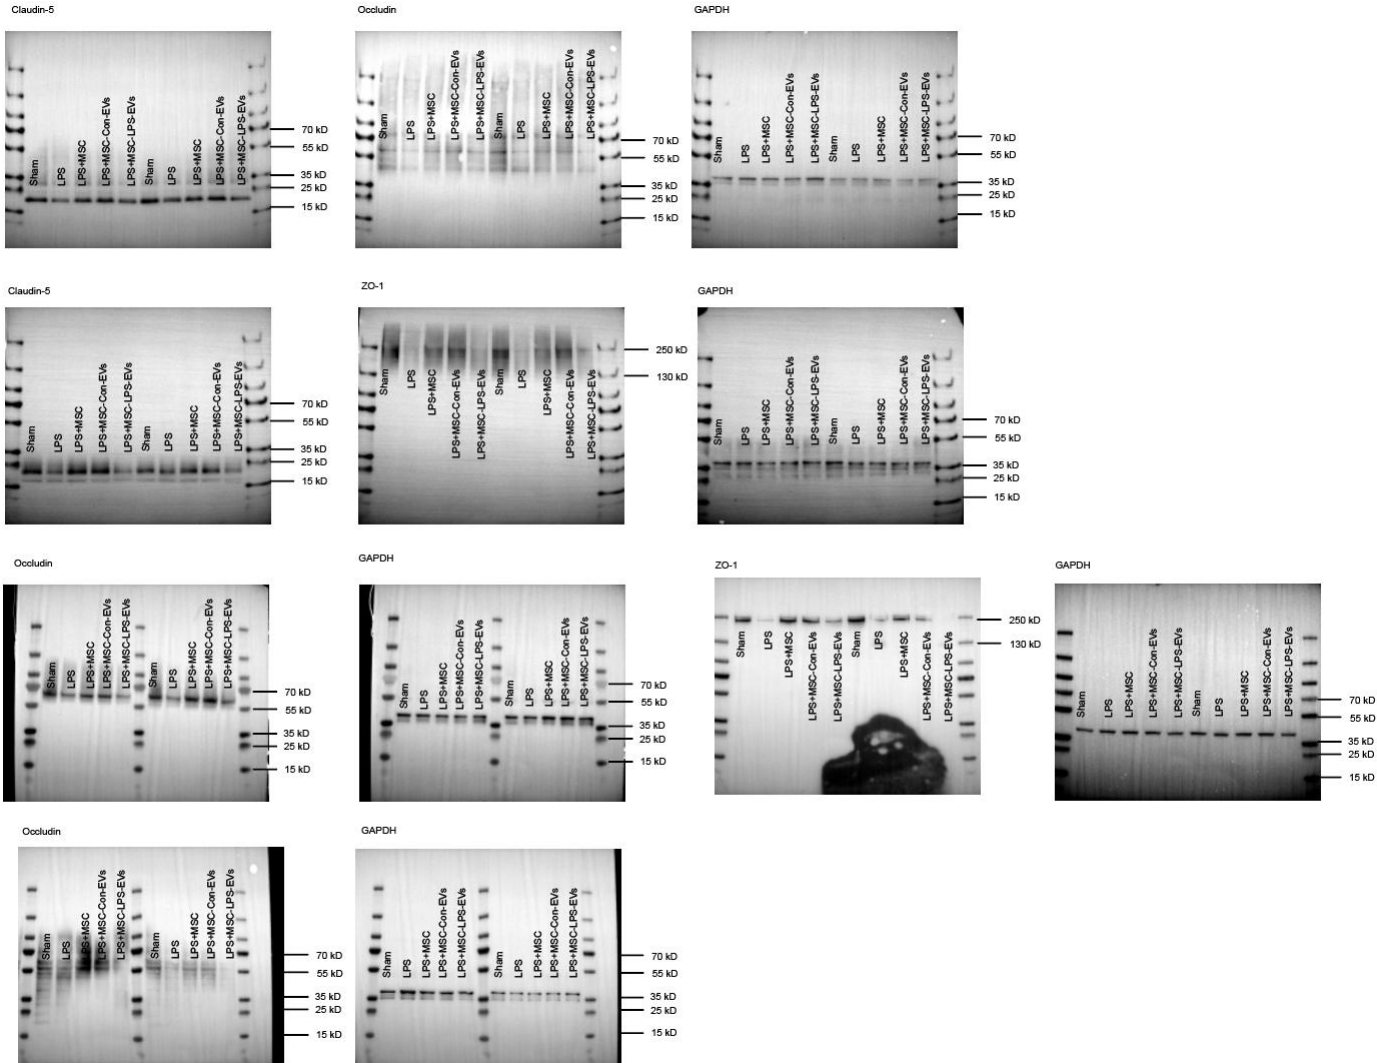

Figure 5D

IDH2

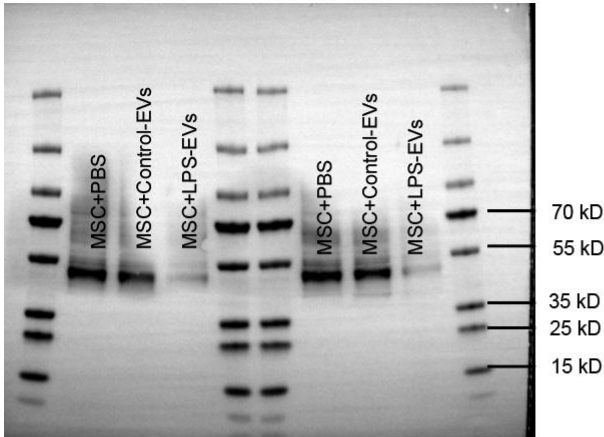

GAPDH

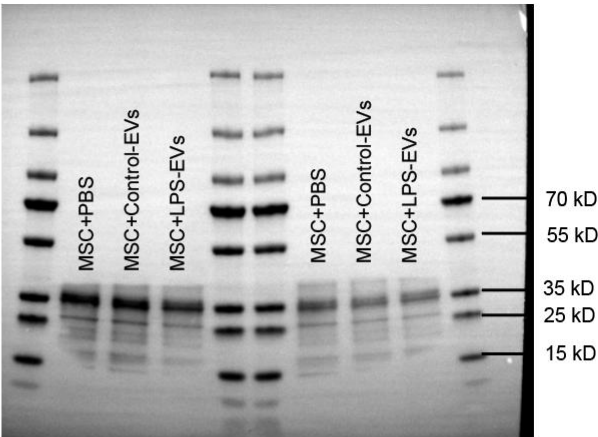

IDH2

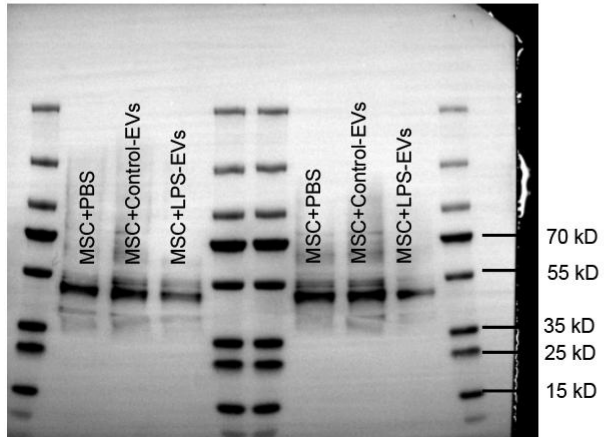

GAPDH

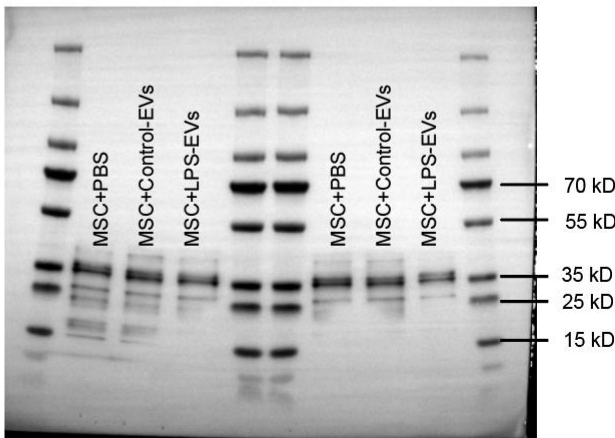

Figure 8G

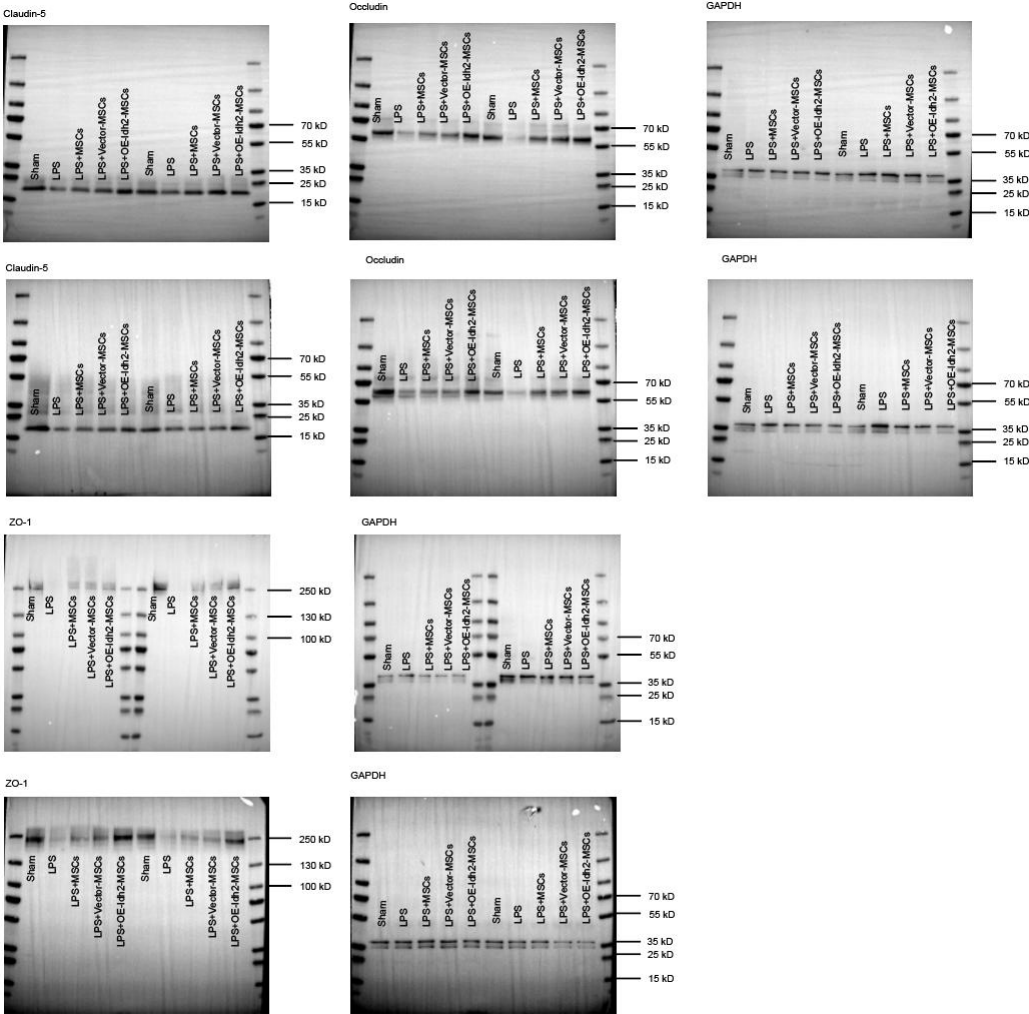

Supplement: MOESM2 [file 12964_2024_1672_MOESM2_ESM.pdf]
